# Supplementary material for: Genomic identification of organelle-localized PPR genes conferring resistance to Phytophthora capsici in Capsicum annuum L.
Source: Research Square preprint supplement (doi:10.21203/rs.3.rs-7901650/v1), 2025-11-13
Supplement: Supplementary file 1 [file 42d2a4bf007965313bd9b068.xlsx]

## Sheet: Sheet1
Table1 Prediction of Subcellular localization to PPR gene family in Zunla-1 and Zhangshugang
Zunla-1			Zhangshugang
Predicted position	Counts	Precent（%）	Predicted position	Counts	Precent（%）
chlo	278	58.0376	chlo	130	65.3266
chlo_mito	5	1.04384	cysk	2	1.00503
cysk	3	0.626305	cyto	27	13.5678
cyto	97	20.2505	mito	21	10.5528
E.R.	2	0.417537	nucl	13	6.53266
extr	10	2.08768	pero	1	0.502513
mito	33	6.88935	plas	4	2.01005
nucl	31	6.47182	vacu	1	0.502513
pero	2	0.417537
plas	15	3.13152
vacu	3	0.626305
Note: chlo: chloroplast; cysk: cytoskeleton; cyto: cytoplasm; ER: endoplasmic reticulum; mito: mitochondrion; nucl: nucleus; pero: peroxisome; plas: plasma membrane; vacu: vacuole
								chlo
								chlo
