# Supplementary material for: Genomic identification of organelle-localized PPR genes conferring resistance to Phytophthora capsici in Capsicum annuum L.
Source: Research Square preprint supplement (doi:10.21203/rs.3.rs-7901650/v1), 2025-11-13
Supplement: Supplementary file 2 [file 5e1ea0c6c410ecf6467052ac.xlsx]

## Sheet: Sheet1
Supplementary Table S1 Primers of to PPR gene family in Zunla-1 and Zhangshugang
Primer name	primer sequnce
PPR_PHT65913_qF	TGAGGTGAACGAGCAGATT
PPR_PHT65913_qR	TCATTACACGAGCAGGAACC
PPR_ PHT91829_qF	TAGTAGCCCGCAACCCAA
PPR_ PHT91829_qR	ATCAGGAGCCGCATCGTTAT
PPR_ PHT75258_qF	AGTTGGGCGTGAAGTGGTT
PPR_ PHT75258_qR	GCTTCCTCGACATTCCATCC
PPR_ PHT92954_qF	TTGGAGGAAGAGGCTGAGA
PPR_ PHT92954_qR	ACCAAAGCACTGAACCAAG
PPR_ PHT93057_qF	AGACTGGAGCATCGGATAG
PPR_ PHT93057_qR	CTGCTACTTCTCCCAACTC
PPR_ PHT89812_qF	GCTAAAGGTGTTCAATGAGATG
PPR_ PHT89812_qR	ATAGCCTGCACGACTGTAA
PPR_ PHT91722_qF	CAGAAGCTCGTCGTGTCT
PPR_ PHT91722_qR	GCATCACCACTCTGACTG
PPR_ PHT87794_qF	GTCCTGATGCTGTTAGTTTAGT
PPR_ PHT87794_qR	GAATCGCATAACCCTGAAG
PPR_ PHT87853_qF	GGTGATGATTGTGGGATGT
PPR_ PHT87853_qR	CTATCAACGCCTTCCTTCCT
PPR_ PHT82891_qF	TGGACACTTGGGAGCACTT
PPR_ PHT82891_qR	ACTTGCCACGCCATTTCA
PPR_ PHT83809_qF	TATCTTGAGTCGTGCTGGTC
PPR_ PHT83809_qR	ACCTGCTTCTGACCTCCT
PPR_ PHT74635_qF	CCTCTGTGCCTTCTGTGTG
PPR_ PHT74635_qR	TTCTGGGCTGTCAAAGTCG
PPR_ PHT72035_qF	GTTTCGGCTGGGATTGTT
PPR_ PHT72035_qR	AGTTTCCATCAAGCTCACA
PPR_ PHT61175_qF	GTGAGTGTATTGCCTGTTTG
PPR_ PHT61175_qR	ACACTTCCCATACGCATCA
PPR_ PHT67124_qF	CTCGCTCGTAACATTGAACC
PPR_ PHT67124_qR	TGCCCAAGAACCCAAGTC
CaUBI3-qF	GCCCTTATGCTGGAGGTGTA
CaUBI3-qR	GGACTCCACTGCTCCTTGAG
