# Supplementary material for: Genomic identification of organelle-localized PPR genes conferring resistance to Phytophthora capsici in Capsicum annuum L.
Source: Research Square preprint supplement (doi:10.21203/rs.3.rs-7901650/v1), 2025-11-13
Supplement: Supplementary file 3 [file 9f0370ff2f48ac7aa48db96f.xlsx]

## Sheet: Sheet1
Supplementary Table S4 Differential expressed gene localization and duplication type analysis
	gene_id	log2FoldChange_24h	log2FoldChange_72h	location	dup_type
Zunla-1_specific	PHT65913	3.48649	5.61503	chlo	Dispersed
	PHT91829	1.62753	4.2412	chlo	WGD or segmental
	PHT67124	0	3.75913	chlo	Tandem
	PHT91722	0.595156	3.33371	chlo	WGD or segmental
	PHT67115	0.336382	3.10492	chlo	WGD or segmental
	PHT67152	-0.0726402	2.96406	cyto	Proximal
	PHT85348	0.677955	2.36208	cysk	Dispersed
	PHT84738	0	2.24476	cyto	Tandem
	PHT75317	0.553563	2.17471	chlo	WGD or segmental
	PHT91941	0	2.09412	cyto	WGD or segmental
	PHT76402	-1.03623	-2.00537	chlo	WGD or segmental
	PHT75006	-1.13103	-2.03029	chlo	Dispersed
	PHT94800	-0.781901	-2.03962	mito	Singleton
	PHT71378	-0.720163	-2.04092	chlo	Singleton
	PHT65477	-1.30205	-2.0537	chlo	Dispersed
	PHT90682	-0.566791	-2.0629	chlo	WGD or segmental
	PHT77589	-0.684119	-2.08148	chlo	Singleton
	PHT86157	-0.922743	-2.12714	chlo	Singleton
	PHT70048	-0.161687	-2.13054	cyto	Dispersed
	PHT91921	-1.17409	-2.16703	chlo	Singleton
	PHT75970	0.42674	-2.16998	cyto	Proximal
	PHT93570	-0.262474	-2.21284	chlo	Singleton
	PHT67752	-0.694038	-2.22917	chlo	Dispersed
	PHT90893	-1.77642	-2.23629	chlo	WGD or segmental
	PHT74026	-0.96575	-2.27	extr	Tandem
	PHT81275	-1.16488	-2.29739	chlo	Singleton
	PHT88312	-0.714188	-2.30465	chlo	WGD or segmental
	PHT91614	-1.591	-2.32615	chlo	Dispersed
	PHT93374	-0.660938	-2.37125	chlo	Singleton
	PHT91914	-1.68685	-2.4166	chlo	WGD or segmental
	PHT92889	-0.497407	-2.46342	chlo	Singleton
	PHT72035	-1.40839	-3.18619	chlo	Singleton
	PHT89812	-2.93956	-3.20858	cyto	Singleton
	PHT93075	-2.2358	-4.32634	chlo	WGD or segmental
	PHT82891	-4.3707	-7.04007	cyto	Dispersed
shared	PHT87853	1.4455	4.21504	chlo	WGD or segmental
	PHT87794	1.53662	3.81739	chlo	WGD or segmental
	PHT83809	0.987011	3.29394	chlo	WGD or segmental
	PHT91166	-1.32995	-2.00009	chlo	Singleton
	PHT95347	-0.753899	-2.03361	nucl	WGD or segmental
	PHT75969	-0.583253	-2.19326	mito	Singleton
	PHT74693	-1.21447	-2.19813	cyto	Dispersed
	PHT72132	-0.638226	-2.21434	chlo	Singleton
	PHT68932	-0.673092	-2.22499	mito	WGD or segmental
	PHT68308	-0.648039	-2.23079	chlo	Singleton
	PHT77767	-0.881803	-2.30049	nucl	Singleton
	PHT95235	-0.959041	-2.42739	cyto	WGD or segmental
	PHT91988	-0.764531	-2.43759	chlo	Singleton
	PHT95514	-1.34452	-2.4612	chlo	WGD or segmental
	PHT77541	-1.99581	-2.68483	chlo	Singleton
	PHT88040	-0.80782	-2.68674	chlo	WGD or segmental
	PHT71971	-1.64795	-2.97153	chlo	WGD or segmental
	PHT84407	-1.97017	-2.97934	cyto	Dispersed
	PHT75258	-1.16426	-3.06908	nucl	Singleton
	PHT92954	-1.40003	-3.56824	nucl	WGD or segmental
	PHT74635	-2.01801	-4.40405	cyto	Dispersed
Zhangshugang_specific	Caz12g26840.1	-1.49576	-2.09385	chlo	Dispersed
