# Supplementary material for: Genomic identification of organelle-localized PPR genes conferring resistance to Phytophthora capsici in Capsicum annuum L.
Source: Research Square preprint supplement (doi:10.21203/rs.3.rs-7901650/v1), 2025-11-13
Supplement: Supplementary file 4 [file b0c2d7c25a5c8f5add1a6347.xlsx]

## Sheet: location
Supplementary Table S2 localization to PPR gene family in Zunla-1 and Zhangshugang
Zunla-1	subcellular localization	Zhangshugang	subcellular localization
PHT95292	chlo	Caz01g01870.1	chlo
PHT93675	cyto	Caz01g04100.1	chlo
PHT95663	chlo	Caz01g05050.1	chlo
PHT92880	mito	Caz01g06200.1	chlo
PHT95466	mito	Caz01g10700.1	chlo
PHT93570	chlo	Caz01g13770.1	chlo
PHT95392	chlo	Caz01g16120.1	chlo
PHT93908	chlo	Caz01g16230.1	chlo
PHT95178	chlo	Caz01g21530.1	chlo
PHT95145	cyto	Caz01g27590.1	chlo
PHT93594	cyto	Caz01g28290.1	chlo
PHT93607	chlo	Caz01g28550.1	chlo
PHT93228	cyto	Caz01g30460.1	chlo
PHT92610	chlo	Caz01g31570.1	chlo
PHT94457	chlo	Caz01g31690.1	chlo
PHT94800	mito	Caz01g34140.1	chlo
PHT93345	cyto	Caz01g34280.1	chlo
PHT95514	chlo	Caz01g35420.1	chlo
PHT92570	chlo	Caz01g38140.1	chlo
PHT93337	plas	Caz02g00240.1	chlo
PHT92791	chlo	Caz02g00500.1	chlo
PHT95020	chlo	Caz02g03260.1	chlo
PHT94890	chlo	Caz02g06340.1	chlo
PHT94975	chlo	Caz02g16160.1	chlo
PHT93817	chlo	Caz02g16390.1	chlo
PHT92954	nucl	Caz02g17300.1	chlo
PHT94268	cyto	Caz02g17920.1	chlo
PHT95347	nucl	Caz02g18470.1	chlo
PHT92749	nucl	Caz02g18610.1	chlo
PHT95876	chlo	Caz02g19520.1	chlo
PHT92889	chlo	Caz02g27670.1	chlo
PHT95754	extr	Caz02g28380.1	chlo
PHT92506	chlo	Caz02g29400.1	chlo
PHT93009	cyto	Caz02g29890.1	chlo
PHT94090	cyto	Caz02g30550.1	chlo
PHT95457	cyto	Caz02g31870.1	chlo
PHT94160	nucl	Caz02g32120.1	chlo
PHT93174	cyto	Caz02g32910.1	chlo
PHT95848	chlo	Caz03g02640.1	chlo
PHT92413	cyto	Caz03g06670.1	chlo
PHT95526	chlo	Caz03g07180.1	chlo
PHT95235	cyto	Caz03g08200.1	chlo
PHT95827	cyto	Caz03g08530.1	chlo
PHT93158	chlo	Caz03g10040.1	chlo
PHT94802	nucl	Caz03g10980.1	chlo
PHT95306	chlo	Caz03g13560.1	chlo
PHT92285	chlo	Caz03g13990.1	chlo
PHT93452	chlo	Caz03g14790.1	chlo
PHT94226	chlo	Caz03g17750.1	chlo
PHT95225	chlo	Caz03g18340.1	chlo
PHT95635	chlo	Caz03g18390.1	chlo
PHT95212	chlo	Caz03g20060.1	chlo
PHT94935	nucl	Caz03g22480.1	chlo
PHT92738	chlo	Caz03g23070.1	chlo
PHT92815	chlo	Caz03g27630.1	chlo
PHT94273	cyto	Caz03g28400.1	chlo
PHT94369	cyto	Caz03g37280.1	chlo
PHT95277	chlo	Caz04g04730.1	chlo
PHT92747	chlo	Caz04g07980.1	chlo
PHT92998	chlo	Caz04g12850.1	chlo
PHT95003	chlo	Caz04g14310.1	chlo
PHT93354	cyto	Caz04g14350.1	chlo
PHT93811	chlo	Caz05g04450.1	chlo
PHT92838	chlo	Caz05g04460.1	chlo
PHT94039	cyto	Caz05g11650.1	chlo
PHT93688	chlo	Caz06g01340.1	chlo
PHT93544	cyto	Caz06g02350.1	chlo
PHT95032	chlo	Caz06g05900.1	chlo
PHT95175	chlo	Caz06g08840.1	chlo
PHT95182	chlo	Caz06g13640.1	chlo
PHT93655	cyto	Caz06g15820.1	chlo
PHT95477	plas	Caz06g16300.1	chlo
PHT93374	chlo	Caz06g18800.1	chlo
PHT92611	chlo_mito	Caz06g24220.1	chlo
PHT93075	chlo	Caz06g26150.1	chlo
PHT90544	chlo	Caz07g05500.1	chlo
PHT92101	chlo	Caz07g06090.1	chlo
PHT90292	chlo	Caz07g09620.1	chlo
PHT91614	chlo	Caz07g11700.1	chlo
PHT89812	cyto	Caz07g12170.1	chlo
PHT90804	mito	Caz07g13340.1	chlo
PHT89913	chlo	Caz07g15790.1	chlo
PHT90650	chlo	Caz07g17320.1	chlo
PHT89556	chlo	Caz07g17470.1	chlo
PHT90864	chlo	Caz07g21160.1	chlo
PHT90901	cyto	Caz07g25230.1	chlo
PHT90840	chlo	Caz08g01680.1	chlo
PHT90593	chlo	Caz08g02250.1	chlo
PHT89042	chlo	Caz08g05350.1	chlo
PHT91914	chlo	Caz08g08250.1	chlo
PHT91926	chlo	Caz08g09350.1	chlo
PHT90167	chlo	Caz08g10360.1	chlo
PHT91503	pero	Caz08g10860.1	chlo
PHT91941	cyto	Caz08g12690.1	chlo
PHT91556	chlo	Caz08g15070.1	chlo
PHT89336	chlo	Caz08g15370.1	chlo
PHT90414	mito	Caz08g17120.1	chlo
PHT91921	chlo	Caz08g17710.1	chlo
PHT91829	chlo	Caz08g23870.1	chlo
PHT91165	chlo	Caz08g25320.1	chlo
PHT89154	vacu	Caz08g26220.1	chlo
PHT91275	mito	Caz09g08660.1	chlo
PHT90893	chlo	Caz09g09780.1	chlo
PHT91103	chlo	Caz09g17670.1	chlo
PHT91682	chlo	Caz09g18150.1	chlo
PHT89462	chlo	Caz09g19070.1	chlo
PHT90801	pero	Caz09g21220.1	chlo
PHT91933	chlo	Caz10g03910.1	chlo
PHT89917	chlo	Caz10g04640.1	chlo
PHT90525	chlo	Caz10g13660.1	chlo
PHT89172	cyto	Caz10g19030.1	chlo
PHT89108	nucl	Caz10g19090.1	chlo
PHT89580	chlo	Caz11g08370.1	chlo
PHT90682	chlo	Caz11g08530.1	chlo
PHT90621	chlo	Caz11g10080.1	chlo
PHT88956	nucl	Caz11g12190.1	chlo
PHT89251	chlo	Caz11g14390.1	chlo
PHT90746	chlo	Caz11g18260.1	chlo
PHT89180	chlo	Caz11g22800.1	chlo
PHT89640	nucl	Caz12g04710.1	chlo
PHT90729	chlo	Caz12g07160.1	chlo
PHT90521	chlo_mito	Caz12g09140.1	chlo
PHT89821	plas	Caz12g14880.1	chlo
PHT90486	cyto	Caz12g16220.1	chlo
PHT90077	chlo	Caz12g17990.1	chlo
PHT91988	chlo	Caz12g19720.1	chlo
PHT91890	chlo	Caz12g23050.1	chlo
PHT91355	chlo_mito	Caz12g23620.1	chlo
PHT91946	chlo	Caz12g23710.1	chlo
PHT91722	chlo	Caz12g26840.1	chlo
PHT89170	mito	Caz06g10100.1	cysk
PHT92043	mito	Caz06g20090.1	cysk
PHT89568	chlo	Caz01g09010.1	cyto
PHT91961	chlo	Caz01g10770.1	cyto
PHT91825	chlo	Caz01g14870.1	cyto
PHT90620	chlo	Caz01g20790.1	cyto
PHT92070	chlo	Caz01g30770.1	cyto
PHT91624	cyto	Caz01g32510.1	cyto
PHT91166	chlo	Caz02g28960.1	cyto
PHT88353	chlo	Caz03g03160.1	cyto
PHT85348	cysk	Caz03g06380.1	cyto
PHT88281	mito	Caz04g07420.1	cyto
PHT86157	chlo	Caz04g11200.1	cyto
PHT88008	nucl	Caz04g14340.1	cyto
PHT87035	chlo	Caz05g02130.1	cyto
PHT85894	mito	Caz05g08430.1	cyto
PHT88307	chlo	Caz06g00170.1	cyto
PHT86717	cyto	Caz06g26160.1	cyto
PHT88312	chlo	Caz06g29410.1	cyto
PHT87676	chlo	Caz07g03500.1	cyto
PHT86600	chlo	Caz07g08490.1	cyto
PHT86366	chlo	Caz07g22770.1	cyto
PHT87443	chlo	Caz08g06330.1	cyto
PHT87447	chlo	Caz08g08810.1	cyto
PHT85920	cyto	Caz09g13930.1	cyto
PHT85268	cyto	Caz11g22130.1	cyto
PHT88934	chlo	Caz12g04920.1	cyto
PHT86116	chlo	Caz12g23320.1	cyto
PHT88573	cyto	Caz12g26680.1	cyto
PHT86795	cysk	Caz01g24810.1	mito
PHT85761	nucl	Caz01g35850.1	mito
PHT88620	cyto	Caz02g00430.1	mito
PHT87276	chlo	Caz02g19220.1	mito
PHT88026	chlo	Caz02g32670.1	mito
PHT88794	cyto	Caz03g07550.1	mito
PHT87423	chlo	Caz03g33050.1	mito
PHT87503	chlo	Caz03g41080.1	mito
PHT85350	chlo	Caz04g01240.1	mito
PHT85583	chlo	Caz04g03120.1	mito
PHT87794	chlo	Caz04g14810.1	mito
PHT88790	chlo	Caz07g06990.1	mito
PHT86460	extr	Caz07g11990.1	mito
PHT85891	nucl	Caz08g11840.1	mito
PHT88741	cyto	Caz08g13390.1	mito
PHT87509	chlo	Caz08g14350.1	mito
PHT87983	cyto	Caz08g15620.1	mito
PHT87053	chlo	Caz10g05510.1	mito
PHT88126	chlo	Caz10g20710.1	mito
PHT88318	chlo	Caz11g04740.1	mito
PHT88405	chlo	Caz11g07380.1	mito
PHT88149	mito	Caz01g06230.1	nucl
PHT85349	chlo	Caz01g08260.1	nucl
PHT88655	mito	Caz01g27720.1	nucl
PHT85304	nucl	Caz01g31900.1	nucl
PHT88040	chlo	Caz03g34130.1	nucl
PHT87649	cyto	Caz04g21050.1	nucl
PHT88202	chlo	Caz06g29380.1	nucl
PHT87948	chlo	Caz07g01890.1	nucl
PHT88548	chlo	Caz07g07010.1	nucl
PHT87092	chlo	Caz07g07860.1	nucl
PHT85679	cyto	Caz08g22110.1	nucl
PHT88306	nucl	Caz10g14420.1	nucl
PHT88433	cyto	Caz12g05440.1	nucl
PHT87369	chlo	Caz02g19190.1	pero
PHT88499	cyto	Caz01g11190.1	plas
PHT87545	chlo	Caz02g10320.1	plas
PHT88403	chlo	Caz04g14890.1	plas
PHT85510	chlo	Caz05g12070.1	plas
PHT88046	chlo	Caz11g17390.1	vacu
PHT86880	chlo
PHT85892	nucl
PHT86862	chlo
PHT88595	chlo
PHT87275	extr
PHT87853	chlo
PHT87234	chlo
PHT84366	chlo
PHT84864	chlo
PHT83854	chlo
PHT83810	chlo
PHT83809	chlo
PHT83806	cyto
PHT83092	nucl
PHT84089	nucl
PHT83488	nucl
PHT84821	mito
PHT83812	chlo
PHT83435	chlo
PHT84736	chlo
PHT83745	plas
PHT83116	nucl
PHT84260	plas
PHT83351	extr
PHT85084	chlo
PHT85117	chlo
PHT84095	cyto
PHT84359	cyto
PHT84647	chlo
PHT83771	mito
PHT84994	mito
PHT83805	chlo
PHT84407	cyto
PHT84726	chlo
PHT83561	chlo
PHT83434	chlo
PHT83932	chlo
PHT84558	chlo
PHT85116	cyto
PHT84224	cyto
PHT84786	plas
PHT84738	cyto
PHT84340	mito
PHT83905	chlo
PHT82891	cyto
PHT83389	chlo
PHT80600	chlo
PHT81294	cyto
PHT80694	cyto
PHT80683	chlo
PHT80616	extr
PHT80615	extr
#Warning	queryProtein
PHT80684	cyto
PHT80656	cyto
PHT81275	chlo
PHT81410	chlo
PHT80569	chlo
PHT81630	chlo
PHT81088	chlo
PHT81258	chlo
PHT81052	mito
PHT81793	cyto
PHT81147	chlo
PHT81855	chlo
PHT82428	chlo
PHT81090	cyto
PHT82233	cyto
PHT80645	chlo
PHT81535	plas
PHT81344	cyto
PHT78362	chlo
PHT79120	chlo
PHT79454	extr
PHT78686	extr
PHT77870	extr
PHT78713	cyto
PHT79629	chlo
PHT77767	nucl
PHT78714	chlo
PHT80411	chlo
PHT78356	cyto
PHT77868	cyto
PHT80272	chlo
PHT78105	chlo
PHT78107	chlo
PHT77735	cyto
PHT77992	chlo
PHT77818	extr
PHT79095	chlo
PHT77973	chlo
PHT80359	cyto
PHT77738	chlo
PHT79489	chlo
PHT79647	cysk
PHT79045	chlo
PHT78715	cyto
PHT77680	chlo
PHT79985	chlo
PHT78794	chlo
PHT77678	nucl
PHT79453	nucl
PHT79855	cyto
PHT80343	chlo
PHT80524	cyto
PHT79730	chlo
PHT78820	cyto
PHT80306	chlo
PHT77589	chlo
PHT79013	chlo
PHT77820	cyto
PHT77978	cyto
PHT77987	cyto
PHT77587	chlo
PHT77942	extr
PHT79266	mito
PHT77743	cyto
PHT79304	chlo
PHT77883	cyto
PHT80333	chlo
PHT79511	chlo
PHT76587	chlo
PHT77512	cyto
PHT76716	chlo
PHT77513	plas
PHT77246	cyto
PHT75175	chlo
PHT75969	mito
PHT77234	nucl
PHT77541	chlo
PHT75666	plas
PHT77089	chlo
PHT77511	cyto
PHT77461	chlo
PHT75097	cyto
PHT75388	chlo
PHT75777	nucl
PHT75094	chlo
PHT76729	chlo
PHT75780	mito
PHT76562	chlo
PHT75295	chlo
PHT75093	chlo
PHT75870	mito
PHT75971	chlo
PHT75318	chlo
PHT75258	nucl
PHT75419	cyto
PHT76735	chlo
PHT77122	chlo
PHT76743	cyto
PHT76557	chlo
PHT75970	cyto
PHT75317	chlo
PHT76481	cyto
PHT76742	cyto
PHT75292	chlo
PHT75270	cyto
PHT77295	nucl
PHT75722	chlo
PHT76943	chlo
PHT76279	chlo
PHT76192	cyto
PHT75638	chlo
PHT75878	nucl
PHT75860	chlo
PHT76119	chlo
PHT76402	chlo
PHT75869	cyto
PHT77418	plas
PHT75585	chlo
PHT75762	chlo
PHT74939	chlo
PHT74525	chlo
PHT74039	chlo
PHT74345	chlo
PHT74026	extr
PHT74579	chlo
PHT75044	chlo
PHT74693	cyto
PHT74635	cyto
PHT74684	chlo
PHT75006	chlo
PHT74776	cyto
PHT74778	plas
PHT74548	chlo
PHT74879	chlo
PHT74685	chlo
PHT74782	plas
PHT74070	chlo
PHT74726	cyto
PHT74357	plas
PHT74784	chlo
PHT72934	cyto
PHT72967	chlo
PHT72686	cyto
PHT71959	chlo
PHT71613	chlo
PHT72699	cyto
PHT71738	chlo
PHT72806	extr
PHT72132	chlo
PHT73359	cyto
PHT72175	chlo
PHT72552	cyto
PHT71971	chlo
PHT71628	mito
PHT73343	chlo
PHT72085	chlo
PHT71966	mito
PHT73348	cyto
PHT72568	chlo
PHT73349	cyto
PHT72627	cyto
PHT72139	chlo
PHT72394	cyto
PHT72035	chlo
PHT71640	cyto
PHT73507	chlo
PHT69807	chlo
PHT69778	cyto
PHT70400	cyto
PHT69798	chlo
PHT69870	chlo
PHT70900	chlo
PHT70952	cyto
PHT70223	E.R.
PHT70137	chlo
PHT70953	nucl
PHT70190	vacu
PHT70298	cyto
PHT71528	mito
PHT70394	chlo
PHT70950	cyto
PHT69850	chlo
PHT70048	cyto
PHT69961	extr
PHT71174	chlo
PHT71378	chlo
PHT69810	chlo
PHT71384	chlo
PHT71182	mito
PHT69142	nucl
PHT67690	chlo
PHT67951	mito
PHT67991	chlo
PHT68588	chlo
PHT68907	mito
PHT68932	mito
PHT69107	cyto
PHT69410	mito
PHT67557	cyto
PHT69010	mito
PHT69149	chlo
PHT69393	nucl
PHT67345	cyto
PHT68769	mito
PHT68308	chlo
PHT67242	nucl
PHT67592	chlo
PHT67968	chlo
PHT67653	mito
PHT67732	vacu
PHT67261	chlo
PHT68763	cyto
PHT67554	chlo
PHT68269	chlo
PHT67556	nucl
PHT68666	cyto
PHT68553	chlo
PHT69396	chlo
PHT67243	cyto
PHT68385	chlo
PHT67714	chlo
PHT68329	mito
PHT67752	chlo
PHT68032	chlo
PHT68606	chlo
PHT67390	E.R.
PHT69026	chlo
PHT65247	plas
PHT67126	chlo
PHT64969	cyto
PHT65461	chlo
PHT65374	plas
PHT65959	chlo
PHT65405	cyto
PHT64755	cyto
PHT64997	chlo
PHT65427	chlo
PHT66328	chlo
PHT65428	chlo
PHT64948	chlo
PHT66728	chlo_mito
PHT65153	chlo
PHT64624	cyto
PHT64603	chlo
PHT67115	chlo
PHT65546	plas
PHT65477	chlo
PHT65407	nucl
PHT66789	chlo
PHT64852	chlo
PHT65483	extr
PHT66699	nucl
PHT66509	chlo
PHT64756	chlo
PHT65634	cyto
PHT65430	chlo
PHT66771	chlo_mito
PHT65125	chlo
PHT65372	cyto
PHT67152	cyto
PHT65648	chlo
PHT65328	nucl
PHT65914	cysk
PHT67124	chlo
PHT65913	chlo
PHT66934	chlo
PHT65592	chlo
PHT64954	chlo
PHT65287	chlo
PHT65866	chlo
PHT64665	nucl
PHT64988	nucl
