# Supplementary material for: Genomic identification of organelle-localized PPR genes conferring resistance to Phytophthora capsici in Capsicum annuum L.
Source: Research Square preprint supplement (doi:10.21203/rs.3.rs-7901650/v1), 2025-11-13
Supplement: Supplementary file 5 [file f251fb9147b8e6b0f0d1fe22.xlsx]

## Sheet: Sheet1
Table 2 Statistics of genome assemblies of Capsicum annuum investigated in this study
Accession	Species	Assembly accession	Assembled genome size (Gb)		Contig N50 (Mb)	Scaffold N50 (Mb)	BUSCO (%)
Zunla-1_v3.0	Capsicum annuum	PRJCA025503		3.08	167.73	264.26	98.76
Zhangshugang	Capsicum annuum	PRJNA800056		3.024	35.415	259.7	97.2
